# Supplementary material for: Dietary Perspectives and Practices during Pregnancy in Rural Amhara Region of Ethiopia: An Exploratory Qualitative Study
Source: PubMed Central journal article supplement (PMC10209480; doi:10.1016/j.cdnut.2023.100079), 2023-04-17
Supplement: mmc1.pdf [file mmc1.pdf]

**Dietary perspectives and practices during pregnancy in rural Amhara region of  
Ethiopia: an exploratory qualitative study**

Firehiwot Workneh Abate

Addis Continental Institute of Public Health, Addis Ababa, Ethiopia

Email: [firehiwotworkneh@addiscontinental.edu.et](mailto:firehiwotworkneh@addiscontinental.edu.et) OR [firehiwotwaciph@gmail.com](mailto:firehiwotwaciph@gmail.com)

### Participant recruitment flow chart

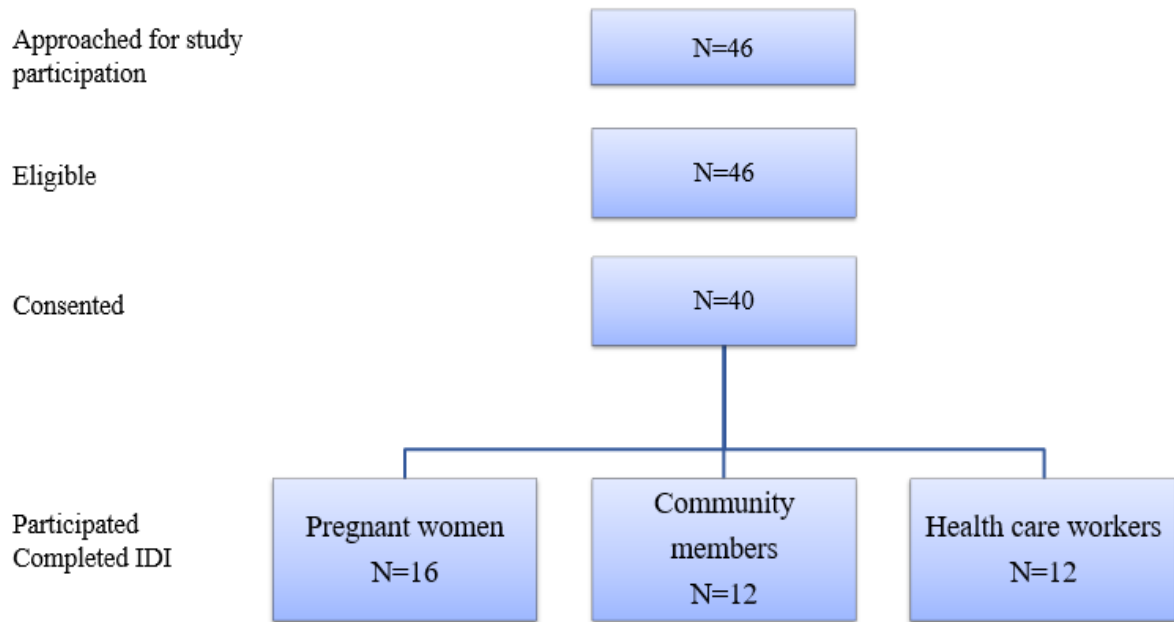

*4 pregnant women and 2 healthcare providers did not provide consent due to competing priorities.*

Supplemental figure 1: Participant recruitment flow chart, n=40.
